# Supplementary material
Source: Springer Nature journal article supplement (https://www.springermedizin.de/resource/supplementary/12889_2009_1998_MOESM5_ESM.pdf/9487250)

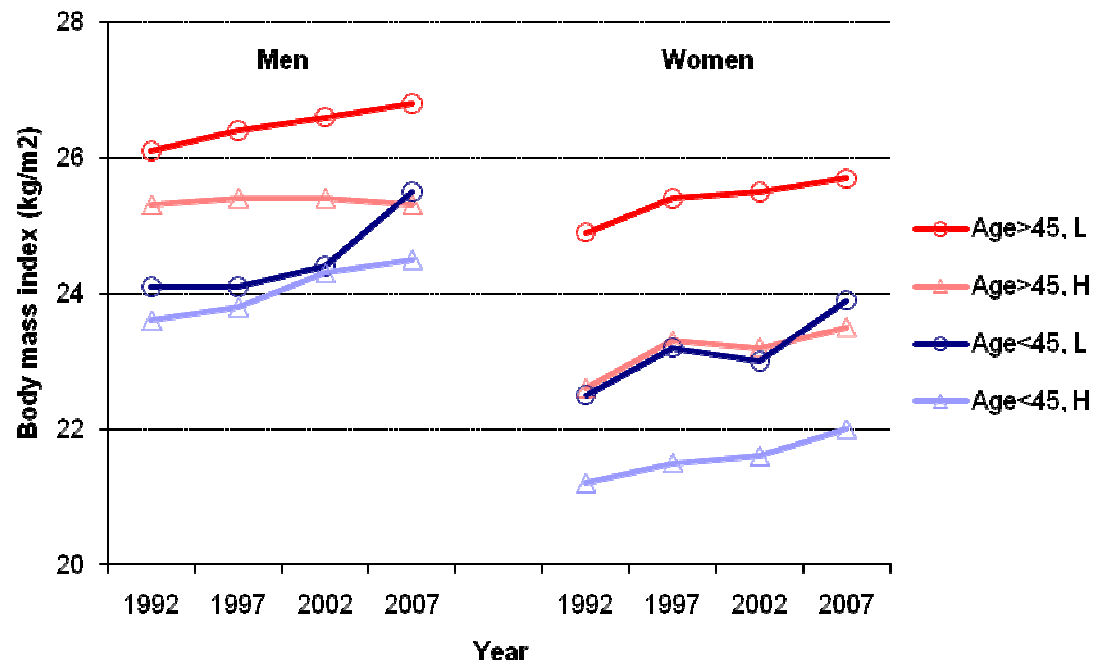

Supplement: MOESM5 [file 9487250]
